# Supplementary material
Source: publisher site journal article supplement (https://www.degruyter.com/publication/journal_key/GEO/downloadAsset/GEO_CFP%20ICGRED%202021.pdf)
Supplement: Supplementary file 1 [file GEO_CFP%20ICGRED%202021.pdf]

# THEORY, EXPERIMENT AND SIMULATION ON GEOLOGY, RESOURCES EXPLORATION AND DEVELOPMENT

## GUEST EDITORS

---

Prof. Xiaoming Sun and Dr. Ahmad Safuan A. Rashid

## DESCRIPTION

---

Geology is closely related to resource exploitation and development, and different engineering geological environments form different resource types. Oil, natural gas, water resources, mineral resources and clean energy such as wind, solar, geothermal, tidal and biomass energy are vital to the production and life of human society. With the development of social economy and the improvement of science and technology, it has become an important subject for sustainable development of human society to improve the efficiency of resource exploration and development, and reduce the damage and pollution to the environment. The purpose of this special issue is to discuss the new theories, methods, materials, technologies and equipment of resource exploration and development in different geological environments. It focuses on the latest progress and trend of theoretical model, experimental research and numerical simulation in the field of resource exploration and development in different geological environments, so as to promote the communication and cooperation among various resources exploration and development, and achieve safe, efficient and green exploitation and utilization for different resources.

The 2nd International Conference on Geology, Resources Exploration and Development (ICGRED 2021) will be held on **January 15-17, 2021** in **Zhuhai, China**. ICGRED 2021 is held to provide an international platform for the innovative academics and industrial experts to discuss the latest trend, share and disseminate the state-of-the-art research in the field of geology. ICGRED 2021 calls for original and excellent papers with topics include but are not limited to the following areas:

- ▶ Geotectonics,
- ▶ Exploration Geology,
- ▶ Mineralogy,
- ▶ Structural Geology,
- ▶ Geochemistry,
- ▶ Geomorphology,
- ▶ Geodynamics.

All participants presenting original researches or reviews are welcome to publish their works in the **Special Issue** of *Open Geosciences*.

## HOW TO SUBMIT

---

All manuscripts (research and review papers) should be submitted online at <https://www.editorialmanager.com/opengeo/>. The submitted manuscripts should meet the requirements provided in **Instruction for Authors**. Authors are encouraged to use the Open Geosciences **Manuscript Template**.

The online paper processing system provides a track dedicated to this Special Issue - please make sure that the option "ICGRED 2021" is selected when you submit your manuscript. *Open Geosciences* ensures that all submitted papers will be considered by the editor and will go through a peer-review process as any other paper. Accepted articles will be indexed, abstracted and published.

The deadline for submission is **May 31, 2021**. Once a paper is accepted for publication, authors will be asked to cover Article Processing Charges.

In case of questions or further detailed information please contact Managing Editor - **Dr. Jan Barabach** ([Jan.Barabach@deguyter.com](mailto:Jan.Barabach@deguyter.com)).

Authors publishing in *Open Geosciences* enjoy the following benefits:

- ▶ **IMPACT FACTOR (2019) - 0.985**
- ▶ no submission charges
- ▶ fast, comprehensive and transparent peer-review
- ▶ free language assistance for authors from non-English speaking regions
- ▶ immediate publication upon completing the publishing process
- ▶ comprehensive abstracting and indexing - JCR and SCIE, SCOPUS
- ▶ extensive promotion and worldwide distribution of each published article
